# Supplementary material for: Genomic Evolution and Clade-Specific Mutation Signatures of Monkeypox Virus (Mpox) from 2022 to 2024 Reveal Distinct African Lineage Divergence
Source: Research Square preprint supplement (doi:10.21203/rs.3.rs-8175950/v1), 2026-02-12
Supplement: Supplementary file 1 [file 6a6d1dc6489e505a80ec4651.xlsx]

## Sheet: Metadata_70
Virus name	Accession ID	Collection date	Location	Host	Additional location information	Sampling strategy	Gender	Patient age	Patient status	Last vaccinated	Passage	Specimen	Additional host information	Clade / Lineage	AA Substitutions
hmpxv/nigeria/cdc-082/1971	EPI_ISL_13058396	1971	Africa / Nigeria	Human			unknown	unknown	unknown		Original				()
hmpxv/drc/cdc-790005/1979	EPI_ISL_13058401	1979	Africa / Democratic Republic of the Congo	Human			unknown	unknown	unknown		Original			Ia	(B2R_D177E,B2R_T167A,B2R_I205T)
hmpxv/drc/cdc-08/1970	EPI_ISL_13058403	1970	Africa / Democratic Republic of the Congo	Human			unknown	unknown	unknown		Original			Ia	(B2R_D177E,B2R_T167A,B2R_I205T)
hmpxv/sudan/uv-01/2005	EPI_ISL_13058459	2005	Africa / Sudan / Nuri	Human			unknown	unknown	unknown		Original			Ia	(C6R_T109A,A14L_S40F,F4.5R_K26R,B17R_C349Y,L6R_L734S,G5R_E337K,B21R_D1717G,M4R_K162E,B18R_Y65I,J1L_T86N,N3R_Y123del,B1R_S68Y,A24R_N100D,F9R_V10I,A19R_K62E,B21R_T928A,E1R_V537I,A5L_T122A,F4.5R_Q49E,A32L_M24V,E13L_I514V,A39R_D106N,F4.5R_R34E,D9L_I425V,C16L_R438G,A41L_G31D,A40L_I112V,B2R_D177E,B9R_F263L,B19R_A34V,F4.5R_T50Q,I8R_S211T,B21R_V173I,J3R_T86N,J1L_L105S,F4.5R_A47R,B17R_V621A,D18L_K93N,B5R_…
hmpxv/drc/tsh-0156/2022	EPI_ISL_14838586	2022	Africa / Democratic Republic of the Congo	Human	Tshopo		Male	6	unknown		Original	Vesicles		Ia	(F4.5R_K26R,L6R_L734S,F9R_V10I,A19R_K62E,B21R_T928A,A5L_T122A,E13L_I514V,A39R_D106N,D9L_I425V,B1R_D120stop,C16L_R438G,A40L_I112V,B9R_F263L,B19R_A34V,I8R_S211T,J3R_T86N,F4.5R_A47R,B17R_V621A,D18L_K93N,D18L_T63A,F4.5R_Y52I,F4.5R_ins78I,B18R_R69T,A34L_P2S,D13L_C241Y,A28L_ins366DD,B9R_I108R,L6R_I1070V,E13L_E111D,B7R_F80C,A17L_A322V,F4.5R_K12S,H7R_H34R,B21R_N334I,A40L_Y107S,R1R_E17K,A18L_T184I,B18R_I5…
hmpxv/drc/kwi-0158/2022	EPI_ISL_14838587	2022	Africa / Democratic Republic of the Congo	Human	Kwilu		Male	8	unknown		Original	Vesicles		Ia	(C6R_T109A,F4.5R_K26R,B17R_C349Y,L6R_L734S,G5R_E337K,B21R_D1717G,M4R_K162E,B18R_Y65I,J1L_T86N,A24R_N100D,F9R_V10I,A19R_K62E,B21R_T928A,E1R_V537I,A5L_T122A,F4.5R_Q49E,A32L_M24V,E13L_I514V,A28L_ins378DDDDDVDDVDDV,A39R_D106N,F4.5R_R34E,D9L_I425V,C16L_R438G,A41L_G31D,A40L_I112V,B2R_D177E,B9R_F263L,B19R_A34V,F4.5R_T50Q,I8R_S211T,B21R_V173I,J3R_T86N,J1L_L105S,F4.5R_A47R,B17R_V621A,D18L_K93N,B18R_V26A,J…
hmpxv/nigeria/ncdc-nrl-008/2022	EPI_ISL_15665432	2022	Africa / Nigeria / Lagos	Human		Non-sentinel-surveillance (hospital)	Male	45	unknown		Original	Lesion swab		IIb A	(A33R_Y119del,L6R_L734S,M4R_K162E,C9L_D478N,A24R_N100D,H4L_K4N,A19R_K62E,B10.5R_D35del,B21R_S722P,C11L_R314del,A33R_N121del,C18L_V323A,Q1L_V104D,H4L_Y740H,F8L_L411W,A13L_K154R,A41L_G31D,B9R_F263L,G7R_L72H,A28L_D377H,A28L_I370D,G10R_A195E,J1L_L105S,A19R_K435E,A28L_ins369DDX,G8L_N196D,J3R_L105S,B21R_I1741M,I8R_Q620R,L5L_T12A,A11L_E359stop,B9R_I108R,C19L_K353E,G1L_I127V,F8L_F108L,B21R_N209D,A28L_I37…
hmpxv/nigeria/ncdc-nrl-043/2022	EPI_ISL_15665435	2022	Africa / Nigeria / Abuja	Human		Non-sentinel-surveillance (hospital)	Male	45	unknown		Original	Lesion swab		IIb A.3	(A33R_Y119del,A47R_D24N,E1R_S108L,M3L_L127Q,L6R_L734S,A27L_R672K,M4R_K162E,C9L_D478N,A24R_N100D,A19R_K62E,B10.5R_D35del,B21R_S722P,C11L_R314del,A33R_N121del,A4L_I355F,B5R_E553G,C18L_V323A,H4L_Y740H,F8L_L411W,C9L_C48R,B9R_F263L,Q1L_S53L,A35R_V88A,A28L_I370D,J1L_L105S,A19R_K435E,A28L_ins369DDX,G8L_N196D,J3R_L105S,B21R_I1741M,I8R_Q620R,B9R_I108R,C19L_K353E,F8L_F108L,B21R_N209D,A28L_I371D,G10R_I142M,…
hmpxv/egypt/moh-nrc-0023/2022	EPI_ISL_18879931	2022	Africa / Egypt	Human			Male	34	Live		Original	Pustule, Nasal, Oropharyngeal swab		IIb B.1	(C7L_V64F,A27L_E316K,A27L_T317Q,C10L_P214T,C18L_S582L,C9L_C48R,E4R_S3L,A27L_S309L,A27L_Y314I,L6R_H173Q,A27L_S315L,C18L_K69Q,A27L_A308C,C15L_S144L,A27L_E313N,B7R_E149K,A27L_E318N,A27L_R311E)
hmpxv/drc/hgrk-1l/2024	EPI_ISL_18886301	2024	Africa / Democratic Republic of the Congo / Kamituga	Human		Longitudinal sampling on same patient(s)	unkwon	unknown	Hospitalized		Original			Ib	(F4.5R_K26R,L6R_L734S,A38R_T143del,F9R_V10I,A19R_K62E,B21R_T928A,A5L_T122A,E13L_I514V,A39R_D106N,D9L_I425V,C16L_R438G,A11L_M740I,A40L_I112V,B9R_F263L,B19R_A34V,I8R_S211T,F4.5R_A47R,B17R_V621A,D18L_K93N,A28L_D380H,N4R_A249T,D18L_T63A,F4.5R_Y52I,F4.5R_ins78I,B18R_R69T,A34L_P2S,D13L_C241Y,B9R_I108R,L6R_I1070V,E13L_E111D,B7R_F80C,F4.5R_K12S,H7R_H34R,B21R_N334I,A28L_D381E,A40L_Y107S,R1R_E17K,A18L_T184…
hmpxv/drc/crsn-1/2023	EPI_ISL_19004044	2023	Africa / Democratic Republic of the Congo / South Kivu / Kamituga	Human			unknown	unknown	unknown		Original			Ib	(F4.5R_K26R,L6R_L734S,A38R_T143del,C19L_G115S,E3R_V50I,Q1L_R380H,F9R_V10I,A25R_K1034R,Q1L_T389P,A19R_K62E,B21R_T928A,A5L_T122A,E13L_I514V,H4L_Y211M,A50R_I480F,A39R_D106N,A2L_F42del,A37R_I92M,D9L_I425V,C16L_R438G,A8L_E586S,A11L_M740I,A40L_I112V,B9R_F263L,B19R_A34V,I8R_S211T,F4.5R_A47R,B17R_V621A,D18L_K93N,N4R_A249T,D18L_T63A,F4.5R_Y52I,A37R_I91T,F4.5R_ins78I,A50R_K488S,B18R_R69T,A34L_P2S,D13L_C241…
hmpxv/drc/crsn-2/2023	EPI_ISL_19004045	2023	Africa / Democratic Republic of the Congo / South Kivu / Kamituga	Human			unknown	unknown	unknown		Original			Ib	(F4.5R_K26R,L6R_L734S,A38R_T143del,C19L_G115S,Q1L_R380H,F9R_V10I,A25R_K1034R,Q1L_T389P,A19R_K62E,B21R_T928A,A5L_T122A,E13L_I514V,H4L_Y211M,A50R_I480F,A39R_D106N,A2L_F42del,A37R_I92M,D9L_I425V,C16L_R438G,A8L_E586S,A43R_I192stop,A11L_M740I,A40L_I112V,B9R_F263L,B19R_A34V,I8R_S211T,F4.5R_A47R,B17R_V621A,D18L_K93N,N4R_A249T,D18L_T63A,F4.5R_Y52I,A37R_I91T,F4.5R_ins78I,A50R_K488S,B18R_R69T,A34L_P2S,D13L…
hmpxv/drc/crsn-5/2024	EPI_ISL_19079343	2024	Africa / Democratic Republic of the Congo / South Kivu / Kamituga	Human			unknown	unknown	unknown		Original			Ib	(F4.5R_K26R,L6R_L734S,A38R_T143del,F9R_V10I,A19R_K62E,B21R_T928A,A5L_T122A,E13L_I514V,A39R_D106N,D9L_I425V,C16L_R438G,A11L_M740I,A40L_I112V,B9R_F263L,B19R_A34V,I8R_S211T,F4.5R_A47R,B17R_V621A,D18L_K93N,N4R_A249T,D18L_T63A,F4.5R_Y52I,F4.5R_ins78I,B18R_R69T,G9R_K221R,A34L_P2S,D13L_C241Y,B9R_I108R,L6R_I1070V,E13L_E111D,B7R_F80C,F4.5R_K12S,H7R_H34R,B21R_N334I,A40L_Y107S,R1R_E17K,A18L_T184I,B18R_I51L,…
hmpxv/drc/crsn-6/2024	EPI_ISL_19079344	2024	Africa / Democratic Republic of the Congo / South Kivu / Kamituga	Human			unknown	unknown	unknown		Original			Ib	(F4.5R_K26R,L6R_L734S,A38R_T143del,F9R_V10I,A19R_K62E,B21R_T928A,A5L_T122A,E13L_I514V,A39R_D106N,D9L_I425V,C16L_R438G,A11L_M740I,A40L_I112V,B9R_F263L,B19R_A34V,I8R_S211T,F4.5R_A47R,B17R_V621A,D18L_K93N,A28L_ins376DII,N4R_A249T,D18L_T63A,F4.5R_Y52I,F4.5R_ins78I,B18R_R69T,A34L_P2S,D13L_C241Y,B9R_I108R,L6R_I1070V,E13L_E111D,B7R_F80C,F4.5R_K12S,H7R_H34R,B21R_N334I,A40L_Y107S,R1R_E17K,A18L_T184I,B18R_…
hmpxv/drc/inrb-0168v/2024	EPI_ISL_19093790	2024	Africa / Democratic Republic of the Congo / Tshopo	Human			Female	15	unknown		Original	Other: Skin lesion vesicle		I	(C6R_T109A,B17R_C349Y,L6R_L734S,G5R_E337K,B21R_D1717G,B18R_Y65I,J1L_T86N,A24R_N100D,A19R_K62E,A5L_T122A,A32L_M24V,E13L_I514V,D9L_I425V,A40L_I112V,B19R_A34V,I8R_S211T,B21R_V173I,J3R_T86N,J1L_L105S,B17R_V621A,D18L_K93N,B18R_V26A,J3R_L105S,D18L_T63A,F4.5R_ins78I,B18R_R69T,D13L_C241Y,A28L_ins366DD,B9R_I108R,B18R_A58P,L6R_I1070V,E13L_E111D,B10.5R_S18T,A28L_Y358H,J2L_N313T,B7R_F80C,B17R_V690A,G8L_I244N…
hmpxv/drc/inrb-0194v/2024	EPI_ISL_19093793	2024	Africa / Democratic Republic of the Congo / Equateur	Human			Female	43	unknown		Original	Other: Skin lesion vesicle		Ia	(C6R_T109A,F4.5R_K26R,B17R_C349Y,L6R_L734S,G5R_E337K,B21R_D1717G,M4R_K162E,B18R_Y65I,J1L_T86N,A24R_N100D,F9R_V10I,A19R_K62E,B21R_T928A,E1R_V537I,A5L_T122A,F4.5R_Q49E,A32L_M24V,A33R_N121del,E13L_I514V,A39R_D106N,F4.5R_R34E,D9L_A608V,D9L_I425V,C16L_R438G,A41L_G31D,A40L_I112V,B2R_D177E,B9R_F263L,B19R_A34V,F4.5R_T50Q,I8R_S211T,B21R_V173I,J3R_T86N,J1L_L105S,F4.5R_A47R,B17R_V621A,D18L_K93N,B18R_V26A,J3…
hmpxv/drc/inrb-0198v/2024	EPI_ISL_19093796	2024	Africa / Democratic Republic of the Congo	Human			Female	38	unknown		Original	Other: Skin lesion vesicle		Ib	(F4.5R_K26R,L6R_L734S,F9R_V10I,A38R_N131I,A19R_K62E,B21R_T928A,A5L_T122A,E13L_I514V,A39R_D106N,D9L_I425V,C16L_R438G,A11L_M740I,A40L_I112V,B9R_F263L,B19R_A34V,A28L_ins366DDDDDDDDD,I8R_S211T,F4.5R_A47R,B17R_V621A,D18L_K93N,N4R_A249T,D18L_T63A,F4.5R_Y52I,F4.5R_ins78I,B18R_R69T,A34L_P2S,D13L_C241Y,B9R_I108R,L6R_I1070V,E13L_E111D,B7R_F80C,F4.5R_K12S,H7R_H34R,B21R_N334I,A40L_Y107S,R1R_E17K,A18L_T184I,B…
hmpxv/drc/inrb-0206v/2024	EPI_ISL_19093797	2024	Africa / Democratic Republic of the Congo	Human			Female	18	unknown		Original	Other: Skin lesion vesicle		Ib	(C6R_T109A,F4.5R_K26R,L6R_L734S,M2R_L75P,B21R_D1717G,M4R_K162E,A24R_N100D,F9R_V10I,A38R_N131I,E1R_V537I,A5L_T122A,F4.5R_Q49E,E13L_I514V,A39R_D106N,F4.5R_R34E,D9L_I425V,A11L_M740I,A41L_G31D,A40L_I112V,B2R_D177E,F4.5R_T50Q,I8R_S211T,B21R_V173I,F4.5R_A47R,J1L_L105S,A19R_P76Q,B17R_V621A,J3R_L105S,N4R_A249T,D18L_T63A,F4.5R_Y52I,F4.5R_ins78I,D13L_C241Y,B9R_I108R,L6R_I1070V,E13L_E111D,A28L_Y358H,J2L_N31…
hmpxv/drc/inrb-0188v/2024	EPI_ISL_19093798	2024	Africa / Democratic Republic of the Congo / Equateur	Human			Male	27	unknown		Original	Other: Skin lesion vesicle		Ia	(C6R_T109A,F4.5R_K26R,B17R_C349Y,L6R_L734S,G5R_E337K,A28L_ins366DDD,B21R_D1717G,M4R_K162E,B18R_Y65I,J1L_T86N,A24R_N100D,F9R_V10I,A19R_K62E,B21R_T928A,A5L_T122A,F4.5R_Q49E,A32L_M24V,A33R_N121del,E13L_I514V,A39R_D106N,F4.5R_R34E,D9L_I425V,C16L_R438G,A41L_G31D,A40L_I112V,B2R_D177E,B9R_F263L,B19R_A34V,F4.5R_T50Q,I8R_S211T,B21R_V173I,J3R_T86N,J1L_L105S,F4.5R_A47R,B17R_V621A,D18L_K93N,B18R_V26A,J3R_L10…
hmpxv/drc/inrb-0203v/2024	EPI_ISL_19093800	2024	Africa / Democratic Republic of the Congo	Human			Female	1	unknown		Original	Other: Skin lesion vesicle		Ib	(F4.5R_K26R,B17R_C349Y,L6R_L734S,M2R_L75P,B21R_D1717G,M4R_K162E,A24R_N100D,F9R_V10I,E1R_V537I,A5L_T122A,F4.5R_Q49E,A32L_M24V,A33R_N121del,E13L_I514V,A39R_D106N,F4.5R_R34E,D19L_P184H,D9L_I425V,C16L_R438G,A11L_M740I,A41L_G31D,A40L_I112V,B2R_D177E,B19R_A34V,F4.5R_T50Q,I8R_S211T,B21R_V173I,F4.5R_A47R,J1L_L105S,B18R_V26A,J3R_L105S,N4R_A249T,D18L_T63A,F4.5R_Y52I,F4.5R_ins78I,A34L_P2S,A26L_V36A,D13L_C24…
hmpxv/drc/inrb-1806v/2023	EPI_ISL_19093802	2023	Africa / Democratic Republic of the Congo / Kinshasa / Kinshasa	Human			Female	27	unknown		Original	Other: Skin lesion vesicle		Ia	(C6R_T109A,F4.5R_K26R,B17R_C349Y,L6R_L734S,G5R_E337K,B21R_D1717G,M4R_K162E,B18R_Y65I,J1L_T86N,A24R_N100D,F9R_V10I,A19R_K62E,E1R_V537I,A5L_T122A,F4.5R_Q49E,A32L_M24V,A33R_N121del,E13L_I514V,A39R_D106N,F4.5R_R34E,D9L_I425V,C16L_R438G,A41L_G31D,A40L_I112V,B2R_D177E,B9R_F263L,B19R_A34V,F4.5R_T50Q,I8R_S211T,B21R_V173I,J3R_T86N,J1L_L105S,F4.5R_A47R,B17R_V621A,D18L_K93N,B5R_N29del,B18R_V26A,J3R_L105S,D1…
hmpxv/drc/inrb-0209v/2024	EPI_ISL_19093803	2024	Africa / Democratic Republic of the Congo	Human			Female	19	unknown		Original	Other: Skin lesion vesicle		Ib	(F4.5R_K26R,L6R_L734S,F9R_V10I,A38R_N131I,A19R_K62E,B21R_T928A,A5L_T122A,E13L_I514V,A39R_D106N,D9L_I425V,C16L_R438G,A11L_M740I,A40L_I112V,B9R_F263L,B19R_A34V,A28L_ins366DDDDDDDDD,I8R_S211T,F4.5R_A47R,B17R_V621A,D18L_K93N,N4R_A249T,D18L_T63A,F4.5R_Y52I,F4.5R_ins78I,B18R_R69T,A34L_P2S,D13L_C241Y,B9R_I108R,L6R_I1070V,E13L_E111D,B7R_F80C,F4.5R_K12S,B21R_N334I,H7R_H34R,A40L_Y107S,R1R_E17K,A18L_T184I,B…
hmpxv/drc/inrb-0025v/2023	EPI_ISL_19093805	2023	Africa / Democratic Republic of the Congo / Tshopo	Human			Male	11	unknown		Original	Other: Skin lesion vesicle		I	(C6R_T109A,F4.5R_K26R,B17R_C349Y,B21R_D1717G,B18R_Y65I,J1L_T86N,A24R_N100D,A5L_T122A,F4.5R_Q49E,E13L_I514V,F4.5R_R34E,A33R_N115del,D9L_I425V,A41L_G31D,A40L_I112V,B2R_D177E,B9R_F263L,F4.5R_T50Q,I8R_S211T,B21R_V173I,J3R_T86N,F4.5R_A47R,B18R_V26A,D18L_T63A,F4.5R_Y52I,F4.5R_ins78I,B18R_R69T,D13L_C241Y,B9R_I108R,A33R_N114del,B18R_A58P,L6R_I1070V,E13L_E111D,B10.5R_S18T,A28L_Y358H,J2L_N313T,B7R_F80C,B17…
hmpxv/drc/inrb-0205v/2024	EPI_ISL_19093815	2024	Africa / Democratic Republic of the Congo	Human			Female	16	unknown		Original	Other: Skin lesion vesicle		Ib	(F4.5R_K26R,L6R_L734S,F9R_V10I,A38R_N131I,A19R_K62E,B21R_T928A,A5L_T122A,E13L_I514V,A39R_D106N,D9L_I425V,C16L_R438G,A11L_M740I,A40L_I112V,B9R_F263L,B19R_A34V,I8R_S211T,F4.5R_A47R,B17R_V621A,D18L_K93N,N4R_A249T,D18L_T63A,F4.5R_Y52I,F4.5R_ins78I,B18R_R69T,A34L_P2S,D13L_C241Y,B9R_I108R,L6R_I1070V,E13L_E111D,B7R_F80C,F4.5R_K12S,H7R_H34R,B21R_N334I,A40L_Y107S,R1R_E17K,A18L_T184I,B18R_I51L,D3R_G112C,A4…
hmpxv/drc/inrb-0217v/2024	EPI_ISL_19093816	2024	Africa / Democratic Republic of the Congo	Human			Female	23	unknown		Original	Other: Skin lesion vesicle		Ib	(C6R_T109A,F4.5R_K26R,B17R_C349Y,L6R_L734S,M2R_L75P,B21R_D1717G,M4R_K162E,A24R_N100D,F9R_V10I,B21R_T928A,A5L_T122A,F4.5R_Q49E,E13L_I514V,A39R_D106N,F4.5R_R34E,D19L_P184H,A33R_N115del,D9L_I425V,C16L_R438G,A11L_M740I,A41L_G31D,A40L_I112V,B2R_D177E,B9R_F263L,B19R_A34V,F4.5R_T50Q,I8R_S211T,F4.5R_A47R,J1L_L105S,A19R_P76Q,B17R_V621A,D18L_K93N,J3R_L105S,N4R_A249T,D18L_T63A,F4.5R_Y52I,F4.5R_ins78I,A34L_P…
hmpxv/drc/inrb-0024c/2023	EPI_ISL_19093822	2023	Africa / Democratic Republic of the Congo / Tshopo	Human			Male	5	unknown		Original	Other: Skin lesion crust		Ia	(C6R_T109A,F4.5R_K26R,B17R_C349Y,L6R_L734S,G5R_E337K,B21R_D1717G,M4R_K162E,B18R_Y65I,J1L_T86N,A24R_N100D,F9R_V10I,A19R_K62E,B21R_T928A,E1R_V537I,A5L_T122A,F4.5R_Q49E,A32L_M24V,A33R_N121del,E13L_I514V,A39R_D106N,F4.5R_R34E,D9L_I425V,C16L_R438G,A41L_G31D,A40L_I112V,B2R_D177E,B9R_F263L,B19R_A34V,F4.5R_T50Q,I8R_S211T,B21R_V173I,J3R_T86N,J1L_L105S,F4.5R_A47R,B17R_V621A,D18L_K93N,B18R_V26A,J3R_L105S,D1…
hmpxv/drc/inrb-0174c/2024	EPI_ISL_19093823	2024	Africa / Democratic Republic of the Congo / Tshopo	Human			Male	12	unknown		Original	Other: Skin lesion crust		I	(C6R_T109A,F4.5R_K26R,L6R_L734S,G5R_E337K,B21R_D1717G,M4R_K162E,B18R_Y65I,J1L_T86N,A24R_N100D,F9R_V10I,A19R_K62E,E1R_V537I,A5L_T122A,F4.5R_Q49E,A32L_M24V,E13L_I514V,A39R_D106N,F4.5R_R34E,A33R_N115del,D9L_I425V,C16L_R438G,A41L_G31D,A40L_I112V,B2R_D177E,B19R_A34V,F4.5R_T50Q,I8R_S211T,B21R_V173I,J3R_T86N,J1L_L105S,F4.5R_A47R,B17R_V621A,D18L_K93N,B18R_V26A,J3R_L105S,D18L_T63A,F4.5R_Y52I,F4.5R_ins78I,…
hmpxv/drc/inrb-0012c/2023	EPI_ISL_19093825	2023	Africa / Democratic Republic of the Congo	Human			Male	18	unknown		Original	Other: Skin lesion crust		Ia	(C6R_T109A,F4.5R_K26R,B17R_C349Y,L6R_L734S,G5R_E337K,B21R_D1717G,M4R_K162E,B18R_Y65I,J1L_T86N,A24R_N100D,F9R_V10I,A19R_K62E,B21R_T928A,E1R_V537I,A5L_T122A,B18R_V9A,F4.5R_Q49E,A32L_M24V,A33R_N121del,E13L_I514V,A39R_D106N,F4.5R_R34E,D9L_I425V,C16L_R438G,A41L_G31D,A40L_I112V,B2R_D177E,B9R_F263L,B19R_A34V,F4.5R_T50Q,I8R_S211T,B21R_V173I,J3R_T86N,J1L_L105S,F4.5R_A47R,B17R_V621A,D18L_K93N,B18R_V26A,J3R…
hmpxv/drc/inrb-0009c/2023	EPI_ISL_19093826	2023	Africa / Democratic Republic of the Congo	Human			Female	1	unknown		Original	Other: Skin lesion crust		Ia	(C6R_T109A,F4.5R_K26R,B17R_C349Y,L6R_L734S,G5R_E337K,A28L_ins366DDD,B21R_D1717G,M4R_K162E,B18R_Y65I,J1L_T86N,A24R_N100D,F9R_V10I,A19R_K62E,B21R_T928A,E1R_V537I,A5L_T122A,F4.5R_Q49E,A32L_M24V,A33R_N121del,E13L_I514V,A39R_D106N,F4.5R_R34E,D9L_I425V,C16L_R438G,A41L_G31D,A40L_I112V,B2R_D177E,B9R_F263L,B19R_A34V,F4.5R_T50Q,I8R_S211T,B21R_V173I,J3R_T86N,J1L_L105S,F4.5R_A47R,B17R_V621A,D18L_K93N,B18R_V2…
hmpxv/drc/inrb-0169c/2024	EPI_ISL_19093829	2024	Africa / Democratic Republic of the Congo / Tshopo	Human			Male	10	unknown		Original	Other: Skin lesion crust		Ia	(C6R_T109A,F4.5R_K26R,B17R_C349Y,L6R_L734S,G5R_E337K,B21R_D1717G,M4R_K162E,B18R_Y65I,J1L_T86N,A24R_N100D,F9R_V10I,A19R_K62E,B21R_T928A,E1R_V537I,A5L_T122A,F4.5R_Q49E,A32L_M24V,A33R_N121del,E13L_I514V,A39R_D106N,F4.5R_R34E,D9L_I425V,A28L_ins377VDDDDDDDX,C16L_R438G,A41L_G31D,A40L_I112V,B2R_D177E,B9R_F263L,B19R_A34V,F4.5R_T50Q,I8R_S211T,B21R_V173I,J3R_T86N,J1L_L105S,F4.5R_A47R,B17R_V621A,D18L_K93N,B…
hmpxv/drc/inrb-0224c/2023	EPI_ISL_19093830	2023	Africa / Democratic Republic of the Congo	Human			Female	21	unknown		Original	Other: Skin lesion crust		Ib	(F4.5R_K26R,L6R_L734S,A38R_T143del,F9R_V10I,A38R_N131I,A19R_K62E,B21R_T928A,A5L_T122A,E13L_I514V,A39R_D106N,D9L_I425V,C16L_R438G,A11L_M740I,A40L_I112V,B9R_F263L,B19R_A34V,A28L_ins366DDDDDDDDD,I8R_S211T,F4.5R_A47R,B17R_V621A,D18L_K93N,N4R_A249T,D18L_T63A,F4.5R_Y52I,F4.5R_ins78I,B18R_R69T,A34L_P2S,D13L_C241Y,B9R_I108R,L6R_I1070V,E13L_E111D,B7R_F80C,F4.5R_K12S,B21R_N334I,H7R_H34R,A40L_Y107S,R1R_E17K…
hmpxv/drc/inrb-0223c/2023	EPI_ISL_19093831	2023	Africa / Democratic Republic of the Congo	Human			Male	6	unknown		Original	Other: Skin lesion crust		Ib	(F4.5R_K26R,L6R_L734S,A38R_T143del,F9R_V10I,A38R_N131I,A19R_K62E,B21R_T928A,A5L_T122A,E13L_I514V,A39R_D106N,D9L_I425V,C16L_R438G,A11L_M740I,A40L_I112V,B9R_F263L,B19R_A34V,A28L_ins366DDDDDDDDD,I8R_S211T,F4.5R_A47R,B17R_V621A,D18L_K93N,N4R_A249T,D18L_T63A,F4.5R_Y52I,F4.5R_ins78I,B18R_R69T,A34L_P2S,D13L_C241Y,B9R_I108R,L6R_I1070V,E13L_E111D,B7R_F80C,F4.5R_K12S,B21R_N334I,H7R_H34R,A40L_Y107S,R1R_E17K…
hmpxv/drc/inrb-0207or/2024	EPI_ISL_19093835	2024	Africa / Democratic Republic of the Congo	Human			Female	31	unknown		Original	Oral swab		Ib	(F4.5R_K26R,F9R_V10I,A38R_N131I,A5L_T122A,E13L_I514V,A39R_D106N,D9L_I425V,C16L_R438G,A11L_M740I,A40L_I112V,B9R_F263L,B19R_A34V,A28L_ins366DDDDDDDDD,I8R_S211T,F4.5R_A47R,B17R_V621A,D18L_K93N,N4R_A249T,D18L_T63A,F4.5R_Y52I,F4.5R_ins78I,B18R_R69T,A34L_P2S,D13L_C241Y,B9R_I108R,L6R_I1070V,E13L_E111D,B7R_F80C,F4.5R_K12S,B21R_N334I,H7R_H34R,A40L_Y107S,R1R_E17K,A18L_T184I,B18R_I51L,D3R_G112C,A47R_L227S,J…
hmpxv/drc/inrb-sub-0134c/2023	EPI_ISL_19287107	2023	Africa / Democratic Republic of the Congo / Sud-Ubangi	Human			Male	3	unknown		Original	Crust		Ia	(C6R_T109A,F4.5R_K26R,B17R_C349Y,L6R_L734S,G5R_E337K,B21R_D1717G,M4R_K162E,B18R_Y65I,A24R_N100D,F9R_V10I,A19R_K62E,B21R_T928A,E1R_V537I,A5L_T122A,F4.5R_Q49E,A32L_M24V,E13L_I514V,A39R_D106N,F4.5R_R34E,D9L_I425V,C16L_R438G,A41L_G31D,A40L_I112V,B2R_D177E,B9R_F263L,B19R_A34V,F4.5R_T50Q,I8R_S211T,B21R_V173I,F4.5R_A47R,B17R_V621A,D18L_K93N,B18R_V26A,D18L_T63A,F4.5R_Y52I,F4.5R_ins78I,B18R_R69T,A34L_P2S,…
hmpxv/drc/inrb-sub-0135v/2023	EPI_ISL_19287108	2023	Africa / Democratic Republic of the Congo / Sud-Ubangi	Human			Female	28	unknown		Original	Vesicles		Ia	(C6R_T109A,F4.5R_K26R,B17R_C349Y,L6R_L734S,G5R_E337K,B21R_D1717G,M4R_K162E,B18R_Y65I,J1L_T86N,A24R_N100D,F9R_V10I,A19R_K62E,B21R_T928A,E1R_V537I,A5L_T122A,F4.5R_Q49E,A32L_M24V,E13L_I514V,A39R_D106N,F4.5R_R34E,E7R_V54M,B8R_I61V,D9L_I425V,C16L_R438G,A41L_G31D,A40L_I112V,B2R_D177E,B9R_F263L,B19R_A34V,F4.5R_T50Q,I8R_S211T,B21R_V173I,J3R_T86N,J1L_L105S,F4.5R_A47R,B17R_V621A,D18L_K93N,B18R_V26A,J3R_L10…
hmpxv/kenya/nvrl220/2024	EPI_ISL_19302262	2024	Africa / Kenya / Taita Taveta	Human	Taveta		Male	45	Hospitalized		Original	Lession swab		Ib	(F4.5R_K26R,L6R_L734S,A38R_T143del,F9R_V10I,A19R_K62E,B21R_T928A,A5L_T122A,E13L_I514V,A39R_D106N,D9L_I425V,C16L_R438G,A11L_M740I,A40L_I112V,B9R_F263L,B19R_A34V,I8R_S211T,F4.5R_A47R,B17R_V621A,D18L_K93N,N4R_A249T,D18L_T63A,F4.5R_Y52I,F4.5R_ins78I,B18R_R69T,A34L_P2S,D13L_C241Y,B9R_I108R,L6R_I1070V,E13L_E111D,B7R_F80C,F4.5R_K12S,H7R_H34R,B21R_N334I,A40L_Y107S,R1R_E17K,A18L_T184I,B18R_I51L,D3R_G112C,…
hmpxv/uganda/mk-012/2024	EPI_ISL_19305614	2024	Africa / Uganda / Central Region	Human		Active surveillance	Female	37	unknown		Original	Lesion Swab and Blood		Ib	(L6R_L734S,A38R_V146I,F9R_V10I,A38R_N131I,A19R_K62E,B21R_T928A,A5L_T122A,E13L_I514V,A39R_D106N,D9L_I425V,B1R_D120stop,C16L_R438G,A11L_M740I,A40L_I112V,B9R_F263L,B19R_A34V,I8R_S211T,B17R_V621A,D18L_K93N,N4R_A249T,D18L_T63A,F4.5R_Y52I,F4.5R_ins78I,B18R_R69T,A34L_P2S,D13L_C241Y,A28L_ins366DD,B9R_I108R,L6R_I1070V,E13L_E111D,B7R_F80C,H7R_H34R,B21R_N334I,A40L_Y107S,R1R_E17K,A18L_T184I,B18R_I51L,D3R_G11…
hmpxv/uganda/mk-014/2024	EPI_ISL_19305615	2024	Africa / Uganda / Central Region	Human		Active surveillance	Female	22	unknown		Original	Lesion Swab and Blood		Ib	(C6R_T109A,B17R_C349Y,L6R_L734S,M2R_L75P,B21R_D1717G,M4R_K162E,A24R_N100D,F9R_V10I,A38R_N131I,A19R_K62E,B21R_T928A,E1R_V537I,A5L_T122A,A32L_M24V,E13L_I514V,A39R_D106N,D19L_P184H,D9L_I425V,C16L_R438G,A11L_M740I,A41L_G31D,A40L_I112V,B2R_D177E,B9R_F263L,B19R_A34V,I8R_S211T,B21R_V173I,J1L_L105S,A19R_P76Q,B17R_V621A,B18R_V26A,J3R_L105S,N4R_A249T,D18L_T63A,A34L_P2S,A26L_V36A,D2L_I60M,D13L_C241Y,B9R_I10…
hmpxv/congo/lnsp-01/2024	EPI_ISL_19345013	2024	Africa / Republic of the Congo / Cuvette-Central	Human			Male	12	unknown		Original	Skin lesion		Ia	(C6R_T109A,F4.5R_K26R,B17R_C349Y,L6R_L734S,G5R_E337K,B21R_D1717G,M4R_K162E,B18R_Y65I,J1L_T86N,A24R_N100D,F9R_V10I,A19R_K62E,B21R_T928A,E1R_V537I,A5L_T122A,F4.5R_Q49E,A32L_M24V,A33R_N121del,E13L_I514V,A39R_D106N,F4.5R_R34E,Q2L_A29T,D9L_I425V,C16L_R438G,A41L_G31D,A40L_I112V,B2R_D177E,B9R_F263L,B19R_A34V,F4.5R_T50Q,I8R_S211T,B21R_V173I,J3R_T86N,J1L_L105S,F4.5R_A47R,B17R_V621A,D18L_K93N,B18R_V26A,J3R…
hmpxv/congo/lnsp-012/2024	EPI_ISL_19345024	2024	Africa / Republic of the Congo / Cuvette-Central	Human			Male	10	unknown		Original	Skin lesion		Ia	(C6R_T109A,F4.5R_K26R,B17R_C349Y,L6R_L734S,G5R_E337K,B21R_D1717G,M4R_K162E,B18R_Y65I,J1L_T86N,A24R_N100D,F9R_V10I,A19R_K62E,B21R_T928A,E1R_V537I,A5L_T122A,F4.5R_Q49E,A32L_M24V,A33R_N121del,E13L_I514V,A39R_D106N,F4.5R_R34E,D9L_I425V,C16L_R438G,A41L_G31D,A40L_I112V,B2R_D177E,B9R_F263L,B19R_A34V,F4.5R_T50Q,I8R_S211T,B21R_V173I,J3R_T86N,J1L_L105S,F4.5R_A47R,B17R_V621A,D18L_K93N,B18R_V26A,J3R_L105S,D1…
hmpxv/congo/lnsp-013/2024	EPI_ISL_19345025	2024	Africa / Republic of the Congo / Cuvette-Central	Human			Male	49	unknown		Original	Skin lesion		Ia	(C6R_T109A,F4.5R_K26R,B17R_C349Y,L6R_L734S,G5R_E337K,B21R_D1717G,M4R_K162E,B18R_Y65I,J1L_T86N,A24R_N100D,F9R_V10I,A19R_K62E,B21R_T928A,E1R_V537I,A5L_T122A,F4.5R_Q49E,A32L_M24V,A33R_N121del,E13L_I514V,A39R_D106N,F4.5R_R34E,D9L_I425V,C16L_R438G,A41L_G31D,A40L_I112V,B2R_D177E,B9R_F263L,B19R_A34V,F4.5R_T50Q,I8R_S211T,B21R_V173I,J3R_T86N,J1L_L105S,F4.5R_A47R,B17R_V621A,D18L_K93N,B18R_V26A,J3R_L105S,D1…
hmpxv/congo/lnsp-017/2024	EPI_ISL_19345029	2024	Africa / Republic of the Congo / Likouala	Human			Male	unknown	unknown		Original	Skin lesion		Ia	(C6R_T109A,F4.5R_K26R,B17R_C349Y,L6R_L734S,G5R_E337K,B21R_D1717G,M4R_K162E,B18R_Y65I,J1L_T86N,A24R_N100D,F9R_V10I,A19R_K62E,B21R_T928A,E1R_V537I,A5L_T122A,F4.5R_Q49E,A32L_M24V,A33R_N121del,E13L_I514V,A39R_D106N,F4.5R_R34E,D9L_I425V,A28L_D380V,C16L_R438G,A41L_G31D,A40L_I112V,B2R_D177E,B9R_F263L,B19R_A34V,F4.5R_T50Q,I8R_S211T,B21R_V173I,J3R_T86N,J1L_L105S,F4.5R_A47R,B17R_V621A,D18L_K93N,B18R_V26A,J…
hmpxv/kenya/kemri-00107/2024	EPI_ISL_19345034	2024	Africa / Kenya / Taita Taveta	Human			unknown	unknown	unknown		Original	Other: Skin lesion, vesicle		Ib	(F4.5R_K26R,L6R_L734S,F9R_V10I,A19R_K62E,B21R_T928A,A5L_T122A,E13L_I514V,A39R_D106N,D9L_I425V,C16L_R438G,A11L_M740I,A40L_I112V,B9R_F263L,B19R_A34V,I8R_S211T,F4.5R_A47R,B17R_V621A,D18L_K93N,N4R_A249T,D18L_T63A,F4.5R_Y52I,F4.5R_ins78I,B18R_R69T,A34L_P2S,D13L_C241Y,B9R_I108R,L6R_I1070V,E13L_E111D,B7R_F80C,F4.5R_K12S,H7R_H34R,B21R_N334I,A40L_Y107S,R1R_E17K,A18L_T184I,B18R_I51L,D3R_G112C,A47R_L227S,J2…
hmpxv/drc/hgrk-14/2024	EPI_ISL_19361897	2024	Africa / Democratic Republic of the Congo / South-Kivu	Human			unknown	unknown	unknown		Original			Ib	(C6R_T109A,F4.5R_K26R,B17R_C349Y,L6R_L734S,M2R_L75P,B21R_D1717G,A38R_T143del,M4R_K162E,A24R_N100D,F9R_V10I,A19R_K62E,B21R_T928A,E1R_V537I,A5L_T122A,A38R_N132del,F4.5R_Q49E,A32L_M24V,A33R_N121del,E13L_I514V,A39R_D106N,F4.5R_R34E,D9L_I425V,C16L_R438G,A11L_M740I,A41L_G31D,A49R_E116K,A40L_I112V,B9R_F263L,F4.5R_T50Q,I8R_S211T,B21R_V173I,F4.5R_A47R,A19R_P76Q,B17R_V621A,B18R_V26A,N4R_A249T,F4.5R_Y52I,F4…
hmpxv/drc/hgrk-15/2024	EPI_ISL_19363685	2024	Africa / Democratic Republic of the Congo / South-Kivu	Human			unknown	unknown	unknown		Original			Ib	(C6R_T109A,B17R_C349Y,L6R_L734S,M2R_L75P,B21R_D1717G,A38R_T143del,M4R_K162E,B18R_Y65I,A24R_N100D,F9R_V10I,A19R_K62E,B21R_T928A,E1R_V537I,A5L_T122A,A38R_N132del,A32L_M24V,A33R_N121del,E13L_I514V,A39R_D106N,D9L_I425V,C16L_R438G,A11L_M740I,A41L_G31D,A40L_I112V,B9R_F263L,I8R_S211T,B21R_V173I,J1L_L105S,A19R_P76Q,B17R_V621A,B18R_V26A,J3R_L105S,N4R_A249T,B18R_R69T,A34L_P2S,A26L_V36A,D13L_C241Y,B9R_I108R…
hmpxv/drc/hgrk-19/2024	EPI_ISL_19364035	2024	Africa / Democratic Republic of the Congo / South-Kivu	Human			unknown	unknown	unknown		Original			Ib	(C6R_T109A,F4.5R_K26R,B17R_C349Y,L6R_L734S,M2R_L75P,B21R_D1717G,A38R_T143del,M4R_K162E,A24R_N100D,F9R_V10I,A19R_K62E,B21R_T928A,E1R_V537I,A5L_T122A,A38R_N132del,F4.5R_Q49E,A32L_M24V,A33R_N121del,E13L_I514V,A39R_D106N,F4.5R_R34E,D9L_I425V,C16L_R438G,A11L_M740I,A41L_G31D,A40L_I112V,B9R_F263L,B19R_A34V,F4.5R_T50Q,I8R_S211T,B21R_V173I,J1L_L105S,F4.5R_A47R,A19R_P76Q,B17R_V621A,B18R_V26A,J3R_L105S,N4R_…
hMpxV/DRC/HGRK-25/2024	EPI_ISL_19365441	2023	Africa / Democratic Republic of the Congo / South-Kivu	Human			unknown	unknown	unknown		Original			Ib	(F4.5R_K26R,L6R_L734S,A38R_T143del,F9R_V10I,A19R_K62E,B21R_T928A,A5L_T122A,E13L_I514V,A39R_D106N,D9L_I425V,C16L_R438G,A11L_M740I,A40L_I112V,B9R_F263L,B19R_A34V,I8R_S211T,F4.5R_A47R,B17R_V621A,N4R_A249T,F4.5R_Y52I,F4.5R_ins78I,B18R_R69T,A34L_P2S,D13L_C241Y,B9R_I108R,L6R_I1070V,E13L_E111D,B7R_F80C,F4.5R_K12S,H7R_H34R,B21R_N334I,A40L_Y107S,R1R_E17K,A18L_T184I,B18R_I51L,D3R_G112C,A47R_L227S,J2R_N313T…
hMpxV/DRC/HGRK-26/2024	EPI_ISL_19365466	2023	Africa / Democratic Republic of the Congo / South-Kivu	Human			unknown	unknown	unknown		Original			Ib	(F4.5R_K26R,L6R_L734S,A38R_T143del,F9R_V10I,A19R_K62E,B21R_T928A,A5L_T122A,E13L_I514V,A39R_D106N,D9L_I425V,C16L_R438G,A11L_M740I,A40L_I112V,B9R_F263L,B19R_A34V,I8R_S211T,F4.5R_A47R,B17R_V621A,N4R_A249T,F4.5R_Y52I,F4.5R_ins78I,B18R_R69T,A34L_P2S,D13L_C241Y,B9R_I108R,L6R_I1070V,E13L_E111D,B7R_F80C,F4.5R_K12S,H7R_H34R,B21R_N334I,A40L_Y107S,R1R_E17K,A18L_T184I,B18R_I51L,D3R_G112C,A47R_L227S,J2R_N313T…
hMpxV/Central African Republic/CIRMF-B2/2016	EPI_ISL_13058470	2016	Africa / Central African Republic	Human			unknown	unknown	unknown		Original			Ia	(F4.5R_K26R,L6R_L734S,G5R_E337K,F9R_V10I,A19R_K62E,B21R_T928A,A5L_T122A,E13L_I514V,A39R_D106N,D9L_I425V,C16L_R438G,A40L_I112V,B9R_F263L,B19R_A34V,I8R_S211T,J3R_T86N,F4.5R_A47R,B17R_V621A,D18L_K93N,D18L_T63A,F4.5R_Y52I,F4.5R_ins78I,B18R_R69T,A34L_P2S,D13L_C241Y,A28L_ins366DD,B9R_I108R,L6R_I1070V,E13L_E111D,B7R_F80C,F4.5R_K12S,H7R_H34R,B21R_N334I,A40L_Y107S,R1R_E17K,A18L_T184I,B18R_I51L,A47R_L227S,…
hMpxV/Central African Republic/CIRMF-B1/2016	EPI_ISL_13058471	2016	Africa / Central African Republic	Human			unknown	unknown	unknown		Original			Ia	(C6R_T109A,F4.5R_K26R,B17R_C349Y,L6R_L734S,G5R_E337K,B21R_D1717G,M4R_K162E,B18R_Y65I,J1L_T86N,A24R_N100D,F9R_V10I,A19R_K62E,B21R_T928A,E1R_V537I,A5L_T122A,F4.5R_Q49E,A32L_M24V,E13L_I514V,A39R_D106N,F4.5R_R34E,D9L_I425V,C16L_R438G,A41L_G31D,A40L_I112V,B2R_D177E,B9R_F263L,B19R_A34V,F4.5R_T50Q,I8R_S211T,B21R_V173I,J3R_T86N,J1L_L105S,F4.5R_A47R,B17R_V621A,D18L_K93N,B18R_V26A,J3R_L105S,D18L_T63A,F4.5R…
hMpxV/Central African Republic/CIRMF-A6/2017	EPI_ISL_13058472	2017	Africa / Central African Republic	Human			unknown	unknown	unknown		Original			Ia	(C6R_T109A,F4.5R_K26R,B17R_C349Y,L6R_L734S,G5R_E337K,B21R_D1717G,M4R_K162E,B18R_Y65I,J1L_T86N,A24R_N100D,F9R_V10I,A19R_K62E,B21R_T928A,E1R_V537I,A5L_T122A,F4.5R_Q49E,A32L_M24V,E13L_I514V,A39R_D106N,F4.5R_R34E,D9L_I425V,C16L_R438G,A41L_G31D,A40L_I112V,B2R_D177E,B9R_F263L,B19R_A34V,F4.5R_T50Q,B1R_S127K,I8R_S211T,B21R_V173I,J3R_T86N,J1L_L105S,F4.5R_A47R,B17R_V621A,D18L_K93N,B18R_V26A,J3R_L105S,D18L_…
hMpxV/Central African Republic/CIRMF-A2/2010	EPI_ISL_13058473	2010	Africa / Central African Republic	Human			unknown	unknown	unknown		Original			Ia	(C6R_T109A,F4.5R_K26R,B17R_C349Y,L6R_L734S,G5R_E337K,B21R_D1717G,M4R_K162E,B18R_Y65I,J1L_T86N,A24R_N100D,F9R_V10I,A19R_K62E,B21R_T928A,E1R_V537I,A5L_T122A,F4.5R_Q49E,A32L_M24V,E13L_I514V,A39R_D106N,F4.5R_R34E,D9L_I425V,C16L_R438G,A41L_G31D,A40L_I112V,B2R_D177E,B9R_F263L,B19R_A34V,F4.5R_T50Q,I8R_S211T,B21R_V173I,J3R_T86N,J1L_L105S,F4.5R_A47R,B17R_V621A,D18L_K93N,B18R_V26A,J3R_L105S,D18L_T63A,F4.5R…
hMpxV/Central African Republic/CIRMF-A1/2001	EPI_ISL_13058474	2001	Africa / Central African Republic	Human			unknown	unknown	unknown		Original			Ia	(C6R_T109A,F4.5R_K26R,B17R_C349Y,L6R_L734S,G5R_E337K,B21R_D1717G,M4R_K162E,B18R_Y65I,J1L_T86N,N3R_Y123del,A24R_N100D,F9R_V10I,A19R_K62E,B21R_T928A,E1R_V537I,A5L_T122A,F4.5R_Q49E,A32L_M24V,E13L_I514V,A39R_D106N,F4.5R_R34E,D9L_I425V,C16L_R438G,A41L_G31D,A40L_I112V,B2R_D177E,B9R_F263L,B19R_A34V,F4.5R_T50Q,I8R_S211T,B21R_V173I,J3R_T86N,J1L_L105S,F4.5R_A47R,B17R_V621A,D18L_K93N,B18R_V26A,J3R_L105S,D18…
hMpxV/Central African Republic/CIRMF-A5/2017	EPI_ISL_13058465	2017	Africa / Central African Republic	Human			unknown	unknown	unknown		Original			Ia	(F4.5R_K26R,L6R_L734S,G5R_E337K,F9R_V10I,A19R_K62E,B21R_T928A,D18L_T63V,A5L_T122A,E13L_I514V,A39R_D106N,D9L_I425V,C16L_R438G,A40L_I112V,B9R_F263L,B19R_A34V,I8R_S211T,J3R_T86N,F4.5R_A47R,B17R_V621A,D18L_K93N,F4.5R_Y52I,F4.5R_ins78I,B18R_R69T,A34L_P2S,D13L_C241Y,A28L_ins366DD,B9R_I108R,L6R_I1070V,E13L_E111D,B7R_F80C,F4.5R_K12S,H7R_H34R,B21R_N334I,A40L_Y107S,R1R_E17K,A18L_T184I,B18R_I51L,A47R_L227S,…
hMpxV/Central African Republic/CIRMF-A4/2017	EPI_ISL_13058466	2017	Africa / Central African Republic	Human			unknown	unknown	unknown		Original			Ia	(F4.5R_K26R,L6R_L734S,G5R_E337K,F9R_V10I,A19R_K62E,B21R_T928A,D18L_T63V,A5L_T122A,E13L_I514V,A39R_D106N,D9L_I425V,C16L_R438G,A40L_I112V,B9R_F263L,B19R_A34V,I8R_S211T,J3R_T86N,F4.5R_A47R,B17R_V621A,D18L_K93N,F4.5R_Y52I,F4.5R_ins78I,B18R_R69T,A34L_P2S,D13L_C241Y,A28L_ins366DD,B9R_I108R,L6R_I1070V,E13L_E111D,B7R_F80C,F4.5R_K12S,H7R_H34R,B21R_N334I,A40L_Y107S,R1R_E17K,A18L_T184I,B18R_I51L,A47R_L227S,…
hMpxV/Central African Republic/CIRMF-38c/2018	EPI_ISL_13058467	2018	Africa / Central African Republic	Human			unknown	unknown	unknown		Original			Ia	(F4.5R_K26R,L6R_L734S,G5R_E337K,F9R_V10I,A19R_K62E,B21R_T928A,A5L_T122A,E13L_I514V,A39R_D106N,A28L_ins371DDDDDDDDDD,D9L_I425V,C16L_R438G,A40L_I112V,B9R_F263L,B19R_A34V,I8R_S211T,J3R_T86N,F4.5R_A47R,B17R_V621A,D18L_K93N,D18L_T63A,F4.5R_Y52I,F4.5R_ins78I,B18R_R69T,A34L_P2S,D13L_C241Y,A28L_ins366DD,B9R_I108R,L6R_I1070V,E13L_E111D,B7R_F80C,F4.5R_K12S,H7R_H34R,B21R_N334I,A40L_Y107S,R1R_E17K,A18L_T184I…
hMpxV/Central African Republic/CIRMF-18/2018	EPI_ISL_13058468	2018	Africa / Central African Republic	Human			unknown	unknown	unknown		Original			Ia	(C6R_T109A,F4.5R_K26R,B17R_C349Y,L6R_L734S,G5R_E337K,B21R_D1717G,M4R_K162E,B18R_Y65I,J1L_T86N,A24R_N100D,F9R_V10I,A19R_K62E,B21R_T928A,E1R_V537I,A5L_T122A,F4.5R_Q49E,A32L_M24V,E13L_I514V,A39R_D106N,F4.5R_R34E,D9L_I425V,C16L_R438G,A41L_G31D,A40L_I112V,B2R_D177E,B9R_F263L,B19R_A34V,F4.5R_T50Q,I8R_S211T,B21R_V173I,J3R_T86N,J1L_L105S,F4.5R_A47R,B17R_V621A,D18L_K93N,O1L_ins6Y,B18R_V26A,J3R_L105S,D18L_…
hMpxV/Central African Republic/CIRMF-015c/2018	EPI_ISL_13058469	2018	Africa / Central African Republic	Human			unknown	unknown	unknown		Original			Ia	(C6R_T109A,F4.5R_K26R,B17R_C349Y,L6R_L734S,G5R_E337K,B21R_D1717G,M4R_K162E,B18R_Y65I,J1L_T86N,A24R_N100D,F9R_V10I,A19R_K62E,B21R_T928A,E1R_V537I,A5L_T122A,F4.5R_Q49E,A32L_M24V,E13L_I514V,A39R_D106N,F4.5R_R34E,D9L_I425V,C16L_R438G,A41L_G31D,A40L_I112V,B2R_D177E,B9R_F263L,B19R_A34V,F4.5R_T50Q,I8R_S211T,B21R_V173I,J3R_T86N,J1L_L105S,F4.5R_A47R,B17R_V621A,O1L_ins6Y,D18L_K93N,B18R_V26A,J3R_L105S,D18L_…
hMpxV/South Africa/NICD-SVPL232/2022	EPI_ISL_13632288	2022	Africa / South Africa / Western Cape	Human			Male	32	Recovering		Original	Skin lesion swab		IIb B.1.7	(A25R_D280N,D5R_R213Q,B17R_S731L,C3L_E42K,A39R_I37N)
hMpxV/Israel/IIBR-ISR001/2022	EPI_ISL_13056910	2022	Asia / Israel	Human			unknown	unknown	unknown		Original			IIb B.1	()
hMpxV/Taiwan/CVDCDC-110-231642/2022	EPI_ISL_13632071	2022	Asia / Taiwan / Taipei	Human			Male	unknown	Hospitalized		Original			IIb B.1.5	(F8L_E888K,F7R_V91A,C16L_T402A)
hMpxV/India/KL-ICMR-21-5432-557/2022	EPI_ISL_13953611	2022	Asia / India / Kerala	Human	Travel to India from UAE		Male	31	Hospitalized		Original	Lesion Fluid	Isolated in Government Hospital	IIb A.2.1	(C9L_I476del,L6R_L734S,M4R_K162E,C9L_D478del,D13L_D13N,C9L_D187N,Q1L_L515P,B6R_P221S,A47R_Q22stop,A19R_K62E,B21R_S722P,L3R_D108N,C2L_R136Q,H4L_Y740H,A25R_V723E,C9L_C48R,B9R_F263L,F1L_M262I,J1L_L105S,A19R_K435E,G8L_N196D,C9L_W477del,J3R_L105S,B21R_I1741M,C19L_K353E,C23R_M79I,B17R_R689C,F8L_F108L,A51R_P95S,B21R_N209D,E1R_D605A,G10R_I142M,J2L_F54S,F9R_N56D,J2R_F54S,G9R_N88D,A19R_Q243R,J1R_H31Y,J3L_N…
hMpxV/South Korea/KDCPA-001/2022	EPI_ISL_14494949	2022	Asia / South Korea	Human			unknown	unknown	unknown		Original	Skin swab		IIb B.1.1	(G7R_A120V,G10R_R194H)
hMpxV/England/UKHSA-1/2022	EPI_ISL_13052278	2022	Europe / United Kingdom / England	Human			unknown	unknown	unknown		Original			IIb B.1	()
hMpxV/Canada/un-NML-2928/2022	EPI_ISL_13408799	2022	North America / Canada	Human			unknown	unknown	unknown		Original	Hypogastrium (suprapubic region): lesion		IIb B.1.4	(C15L_S128L,H2R_R88K,C2L_D162N)
hMpxV/USA/NY-CDC-003/2022	EPI_ISL_13744898	2022	North America / USA / New York	Human			unknown	unknown	unknown		Original			IIb B.1	()
hMpxV/Mexico/CMX-InDRE-IBT-001/2022	EPI_ISL_13624509	2022	North America / Mexico / Mexico City	Human	Travel history: Amsterdam-Netherlands		Male	50	Released		Original	Scab		IIb B.1	()
hMpxV/USA/MA-CDC-001/2022	EPI_ISL_13052289	2022	North America / USA / Massachusetts	Human			unknown	unknown	unknown		Original			IIb B.1	()
hMpxV/Peru/LIM-INS-010/2022	EPI_ISL_14207725	2022	South America / Peru / Lima	Human			Male	23	Live		Original	Lesion swab		IIb B.1.6	()
hMpxV/Brazil/SP-IAL-06/2022	EPI_ISL_13343718	2022	South America / Brazil / Sao Paulo / Indaiatuba	Human	Travel to Ireland, Spain, and Netherlands		Male	28	Released		Original	Lesion swab		IIb B.1.10	(E3R_E47K,H5R_S92F)
